1       **Gut microbiota of the pine weevil degrades conifer diterpenes and**  
2                                       **increases insect fitness**

3       Aileen Berasategui<sup>1,2</sup>, Hassan Salem<sup>2,3</sup>, Christian Paetz.<sup>4</sup>, Maricel Santoro<sup>1,5</sup>,  
4                                       Jonathan Gershenzon.<sup>1</sup>, Martin Kaltenpoth<sup>6</sup>, Axel Schmidt<sup>1</sup>

5  
6       <sup>1</sup> Biochemistry Department, Max Planck Institute for Chemical Ecology, 07745 Jena,  
7                                       Germany.

8       <sup>2</sup> Insect Symbiosis Research Group, Max Planck Institute for Chemical Ecology,  
9                                       07745 Jena, Germany.

10       <sup>3</sup> Department of Biology, Emory University, 30320 Atlanta, GA, U.S.A.

11       <sup>4</sup> NMR Department, Max Planck Institute for Chemical Ecology, 07445 Jena,  
12                                       Germany.

13       <sup>5</sup> Departamento de Biología Molecular, Universidad Nacional de Río Cuarto, Campus  
14                                       Universitario, 5800 Río Cuarto, Argentina

15       <sup>6</sup> Department for Evolutionary Ecology, Johannes Gutenberg University Mainz, 55122  
16                                       Mainz, Germany

17  
18       Correspondence to:

19       Aileen Berasategui: [berasategui.lopez@gmail.com](mailto:berasategui.lopez@gmail.com)

20       Martin Kaltenpoth: [mkaltenpoth@uni-mainz.de](mailto:mkaltenpoth@uni-mainz.de)

21  
22  
23       Running title:

24       Insect gut symbionts degrade plant defenses

25  
26  
27       **Keywords:** pine weevil, microbiota, symbiosis, terpene degradation, plant secondary

28       metabolites

29

30 **Abstract**

31 The pine weevil (*Hylobius abietis*), a major pest of conifer forests throughout Europe,  
32 feeds on the bark and cambium, tissues rich in terpenoid resins that are toxic to  
33 many insect herbivores. Here we report the ability of the pine weevil gut microbiota to  
34 degrade the diterpene acids of Norway spruce. The diterpene acid levels present in  
35 ingested bark were substantially reduced on passage through the pine weevil gut.  
36 This reduction was significantly less upon antibiotic treatment, and supplementing  
37 the diet with gut suspensions from untreated insects restored the ability to degrade  
38 diterpenes. In addition, cultured bacteria isolated from pine weevil guts were shown  
39 to degrade a Norway spruce diterpene acid. In a metagenomic survey of the insect's  
40 bacterial community, we were able to annotate several genes of a previously  
41 described diterpene degradation (*dit*) gene cluster. Antibiotic treatment disrupted the  
42 core bacterial community of *H. abietis* guts and eliminated nearly all *dit*-genes  
43 concordant with its reduction of diterpene degradation. Pine weevils reared on an  
44 artificial diet spiked with diterpenes, but without antibiotics, were found to lay more  
45 eggs with a higher hatching rate than weevils raised on diets with antibiotics or  
46 without diterpenes. These results suggest that gut symbionts contribute towards host  
47 fitness, but not by detoxification of diterpenes, since these compounds do not show  
48 toxic effects with or without antibiotics. Rather the ability to thrive in a terpene rich  
49 environment appears to allow gut microbes to benefit the weevil in other ways, such  
50 as increasing the nutritional properties of their diet.

51

52

## 53 **Introduction**

54 The interactions between plants and insects are often mediated by plant secondary  
55 metabolites. In addition to acting as feeding attractants, these molecules can also be  
56 involved in plant defense acting as feeding deterrents or toxins that disrupt gut  
57 membranes, impede digestion, hinder normal metabolism, or block ion and nutrient  
58 transport, among other effects (Mithoefer and Boland 2012). Herbivores have, in  
59 turn, evolved different mechanisms to overcome the noxious effects of plant  
60 defenses (Hammer and Bowers 2015). These involve modification of feeding  
61 behavior to avoid ingesting high amounts, manipulation of plant defenses to lower  
62 their concentrations, increased excretion rates, sequestration away from sensitive  
63 processes, target site insensitivity and metabolic degradation (Després et al. 2007).

64 In addition, insects do not face the threat of plant defenses alone, but together with  
65 their gut microbes (Hammer and Bowers 2015). Symbiotic microorganisms have  
66 repeatedly been demonstrated to influence interactions between plants and  
67 herbivores by supplementing essential nutrients or degrading complex dietary  
68 polymers (Douglas 2009). Recently, these microbial functions have been expanded  
69 to encompass the manipulation (Chung et al. 2013) and degradation of plant  
70 secondary metabolites (Hammerbacher et al. 2013, De Fine Licht et al. 2012 Kohl et  
71 al. 2014, Ceja-Navarro et al. 2015, Welte et al. 2015). However, gut microbes are  
72 also susceptible to some plant toxins (Bakkali et al. 2008) and might even be their  
73 primary target (Mithoefer and Boland 2012).

74 Many herbivores exploit conifers as a food source. Feeding on conifer tissues is not  
75 only problematic nutritionally due to their low concentrations of nitrogen, phosphorus,  
76 vitamins and sterols, but conifers typically also contain high concentrations of  
77 defensive phenolic compounds and terpenoid resins composed mainly of  
78 monoterpene olefins and diterpene resin acids (Keeling and Bohlmann 2006). These

79 defenses are constitutively expressed and can also be induced upon herbivory. With  
80 more than 50,000 compounds, terpenes are the most diverse family of plant  
81 defenses described to date (Conolly and Hill 1991). Their protective effects include  
82 antimicrobial properties (Rastogi et al. 1998, Lunde et al. 2000) as well as feeding  
83 deterrence and toxicity against insects, and thus might be involved in conifer  
84 resistance against herbivores. Although the exact mode of terpene action is unknown  
85 in most cases (Gershenson and Dudareva 2007), they seem to derive some of their  
86 toxic properties from the disruption of gut membranes due to their lipophilic nature or  
87 by causing neural damage through compromised ion channels (Keeling and  
88 Bohlmann 2006).

89

90 Although many insects are able to perform well in the presence of low terpene  
91 concentrations, higher amounts can act as deterrents or growth inhibitors (Zhao et al.  
92 2011). A number of terpenes have been associated with toxicity to conifer-feeding  
93 insects (Cook and Hain 1988, Raffa and Smalley 1995, Werner 1995). For example,  
94 monoterpenes and diterpenes are correlated with white and Sitka spruce resistance  
95 against the white pine weevil (*Pissodes strobi*) (Harris et al. 1983, Tomlin et al. 1996,  
96 2000) and diterpenes are correlated with Jack pine resistance against sawflies (Ikeda  
97 et al. 1977). Likewise, the Douglas fir pitch moth (*Synanthedon novaroensis*) is more  
98 successful attacking lodgepole pines containing low amounts of the monoterpene  
99 delta-3-carene (Rocchini et al. 2000). Similarly, the application of methyl jasmonate  
100 on seedlings, which increases chemical defenses including terpenes in many conifer  
101 species (Martin et al. 2002, Heijari et al. 2005, Schmidt et al. 2005, Moreira et al.  
102 2009) correlates with higher resistance against the pine weevil (Heijari et al. 2005,  
103 Erbilgin et al. 2006, Sampedro et al. 2011).

104

105 Some environmental bacteria are known to degrade terpenes. For instance,  
106 *Pseudomonas abietaniphila* BKME-9 (Martin et al. 2000) and *Burkholderia*

107 *xenovorans* (Smith et al. 2007) have been reported to degrade diterpene resin acids.  
108 However, the ability to degrade and utilize terpenes is not limited to environmental  
109 microorganisms, but also occurs in symbiotic microbes associated with vertebrates  
110 and invertebrates. Goat rumen-associated bacteria can degrade several  
111 monoterpenes (Malecky et al. 2012), and some members of the gut community of  
112 bark beetles are capable of *in vitro* degradation of monoterpenes and diterpenes  
113 (Boone et al. 2013, Xu et al. 2015). However, whether bacterial degradation of  
114 terpenes occurs within the insects as well has not been explored.

115

116 The pine weevil, *Hyllobius abietis* (Coleoptera: Curculionidae: Molytinae), feeds on  
117 bark and phloem of several conifer species. It is considered the most damaging  
118 conifer pest in managed forests in Europe (Leather et al. 1999, Nordlander et al.  
119 2011) given its devastating impact on newly planted seedlings (Pettersson and  
120 Orlander 2003). While adults feed both above and below ground, larvae complete  
121 their development underground tunneling in the bark of stump roots (Nordlander et  
122 al. 2005, Wallertz et al. 2006). Therefore, pine weevils encounter high concentrations  
123 of resin terpenes throughout their life cycle. Despite many reports on the noxious  
124 effects of terpenoids on herbivores, the pine weevil seems able to cope well with  
125 these compounds. Weevils feeding on Sitka spruce show a positive correlation  
126 between adult feeding, larval development and high concentrations of both  
127 carbohydrates and resin (Langström and Day 2004), suggesting that the pine weevil  
128 is adapted to a wide range of terpene concentration. However, high resin content  
129 often deters them from feeding in Scots pine (Ericsson et al. 1988). At present, it is  
130 not known what mechanisms pine weevils employ to circumvent these compounds,  
131 and whether they do so on their own or through association with symbiotic  
132 microorganisms.

133 Here we investigate whether the microbial associates of the pine weevil can play a  
134 role in overcoming conifer defenses. The gut microbiota of the pine weevil is  
135 geographically stable across Europe, especially within the most abundant bacterial  
136 family, the Enterobacteriaceae (Berasategui et al. 2016). The core microbiota of this  
137 insect consists of members of the genera *Erwinia*, *Rahnella*, and *Serratia*. This  
138 community assembly seems to be shaped, at least in part, by the nutritional resource  
139 these insects exploit (i.e. conifer bark and cambium). It extends beyond the pine  
140 weevil, being similar in other conifer feeding beetles, including several species of the  
141 genus *Dendroctonus* and *Ips pini* (Cardoza et al. 2006, Adams et al. 2013, Hu et al.  
142 2014, Berasategui et al. 2016, Dohet et al. 2016) as well as wood-feeding wasps  
143 (Adams et al. 2011), but it is absent in weevils feeding on non-conifer food sources  
144 such as crops or ornamental plants (Berasategui et al. 2016). Among the different  
145 members of this conserved community, species of the genera *Pseudomonas*,  
146 *Rahnella* and *Serratia* have been described based on metagenomics data (Adams et  
147 al. 2013) or phylogenetic inference (Berasategui et al. 2016) to contain many genes  
148 involved in diterpene degradation.

149

150 In this communication, we follow up on our broad survey of the gut community in the  
151 pine weevil and ask whether this consortium of microbes is involved in conferring  
152 resistance against plant terpenoid defenses encountered by their insect host. After  
153 first finding that diterpene resin acids are reduced during passage through the pine  
154 weevil, we manipulated the gut microbiota using antibiotics to determine if microbes  
155 are involved in degradation. We also used cultured pine weevil microbes to establish  
156 their diterpene degradative capacity outside the insect. Additionally, we sequenced  
157 the bacterial metagenome of individuals feeding on different diets in order to explore  
158 the taxonomic changes occurring under antibiotic treatment and whether the  
159 bacterial community contains the aforementioned diterpene-degrading *dit*-gene

160 cluster. Finally, we performed bioassays to assess the effect of both diterpenes and  
161 gut microbes on the fitness of the insect host.

162

## 163 Results

### 164 Diterpene levels after passage through weevils

165 We first determined whether diterpene resin acids were degraded during transit  
166 through the pine weevil gut. Insects were fed on Norway spruce branches overnight  
167 and their feces were collected after 24 hours. The diterpenes in both food and feces  
168 were identified and quantified by gas chromatography-mass spectrometry (GC-MS)  
169 of the methyl ester derivatives. Our results show that total diterpene content was  
170 reduced by 80% in feces relative to ingested material (Fig. 1A. All individual  
171 diterpenes detected were reduced by more than 50%, except dehydroabietic acid  
172 (DHAA), which was reduced by only 7% (Fig. 1B). These results demonstrate  
173 substantial diterpene degradation during gut passage.

174

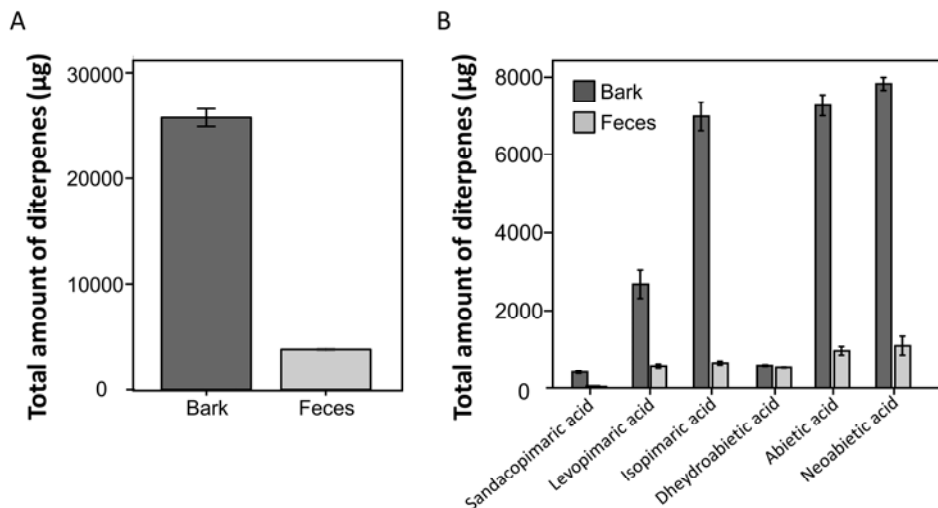

175

176 **Figure 1.** Amounts of (A) total and (B) individual diterpenes ingested by *H. abietis*' feeding on  
177 Norway spruce bark (62 insects in 16 hours) compared to the amounts in their feces after  
178 digestion. The diterpene content of bark and feces samples was analyzed by GC-MS. The  
179 amount of bark ingested was determined by weighing twigs offered to the insect before and  
180 after the feeding period. Experiment was repeated twice with similar results.

181

182 **Diterpene degradation by bacteria in weevils**

183 To test whether microorganisms mediate weevil degradation of the diterpene resin  
184 acids observed after passage through the pine weevil gut, we manipulated the gut  
185 microbes through the application of the broad-spectrum antibiotic rifampicin to a  
186 semi-artificial diet, and subsequently assessed the diterpene content in the feces of  
187 the experimental animals by GC-MS. We observed an increase in the amounts of all  
188 the major diterpenes detected in the feces of antibiotic-treated individuals relative to  
189 the untreated control group (Fig. 2) ( $P=0.001$  in all cases). Reinfection of the gut with  
190 the native community by supplementing the diet with a gut suspension of untreated  
191 individuals into the diet of antibiotic-treated insects rescued the insect's  
192 biodegradative capacity, suggesting that gut microbes are responsible for the  
193 breakdown of such compounds within the host. This re-acquired degradation  
194 capacity resulted in the complete elimination of all diterpenes.

195



196

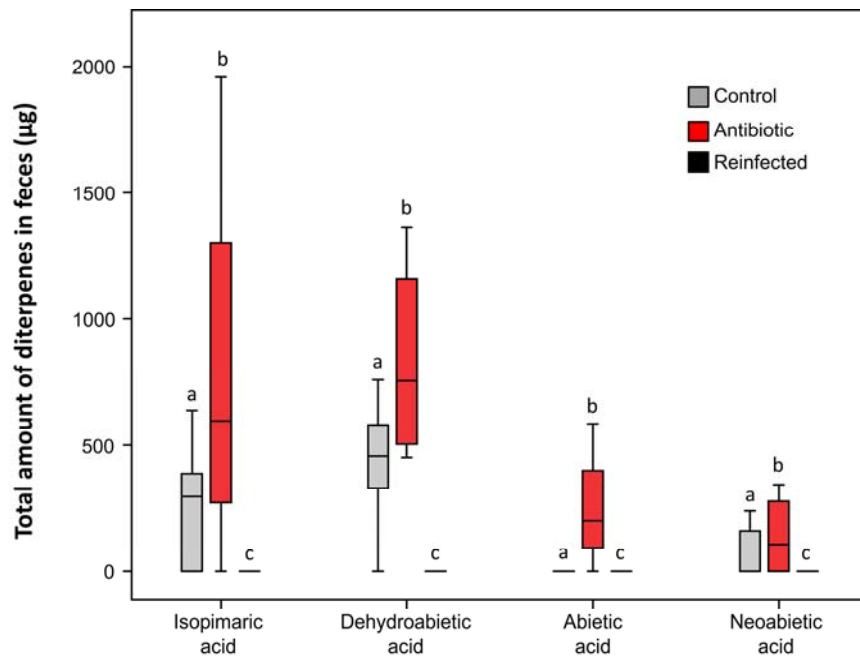

197

198 **Figure 2.** Amount ( $\mu\text{g}$ ) of major diterpenes in feces of pine weevils feeding on different diets.  
199 Color of boxes signifies the experimental treatment: Control, semi-artificial diet with ground  
200 Norway spruce for 14 days; Antibiotic, diet amended with rifampicin for 14 days, Reinfected,  
201 after being fed with an antibiotic diet for 7 days, these insects were fed diet amended with a  
202 weevil gut suspension for 7 days; Lines represent medians, boxes comprise the 25–75th  
203 percentiles, and whiskers denote the range.  
204

### 205 Diterpene degradation by cultured weevil microbes

206 To test whether the gut community of *H. abietis* can degrade terpenes, we isolated  
207 bacteria from the guts of the weevil and cultivated them in LB medium overnight.  
208 Bacteria were inoculated into medium amended with DHAA (sodium salt) at a  
209 concentration of 500  $\mu\text{g}/\text{ml}$ , which is in the range of that found in spruce tissue. This  
210 compound was chosen because of its commercial availability in high purity and  
211 comparatively greater stability in solution, as compared to other diterpene acids from  
212 Norway spruce. Sterile, uninoculated medium amended with DHAA served as the  
213 control. Although no significant differences in concentration were detected after 1 day  
214 of treatment (ANOVA,  $P=0.98$ ), we observed a significant reduction in the amount of

215 DHAA in the presence of bacteria compared to controls at five days (ANOVA,  
216  $P=0.03$ ) (Fig. 3).

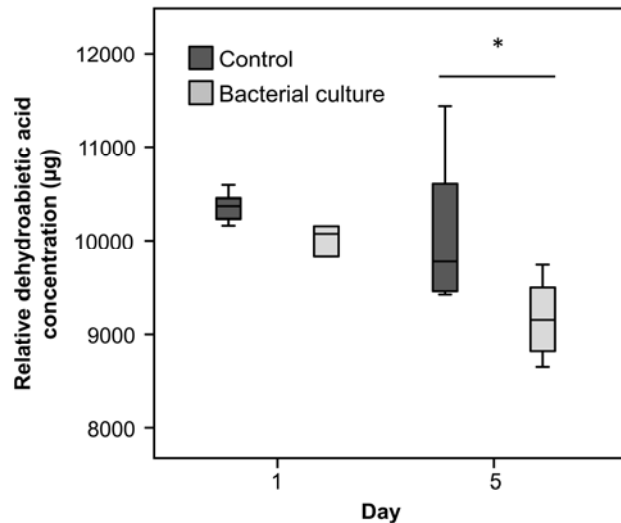

217

218 **Figure 3.** Degradation of the sodium salt of dehydroabietic acid (DHAA) by cultured bacteria  
219 isolated from *H. abietis* after 1 and 5 days of growth in LB medium. The initial concentration of  
220 DHAA was 14.8µg/mL. Lines represent medians, boxes comprise the 25–75 percentiles, and  
221 whiskers denote the range. (ANOVA,  $P=0.03$ ).

222

### 223 **Metagenomic insights into diterpene degradation**

224 To characterize the genetic basis of bacterial-mediated diterpene degradation in *H.*  
225 *abietis*, we sequenced the bacterial metagenome of weevils feeding on their natural  
226 food source (Norway spruce) compared to weevils feeding on an artificial diet, as  
227 well as an artificial diet supplemented with antibiotics. Each library contained on  
228 average 15.3 million base pairs (Table S1), and assemblies resulted in an average of  
229 49.983 contigs per library.

230

231 Of the contigs from the metagenome assembly of weevils fed on spruce, 72.1% were  
232 assigned to a bacterial origin, and 27.5% to an eukaryotic origin (Table S2).  
233 Consistent with our previous 16S rRNA-based survey of the insect's microbiome  
234 (Berasategui et al. 2016), community profiling using protein-coding genes revealed  
235 the gut microbiota of weevils feeding on a coniferous diet to be dominated by

236 gammaproteobacterial associates that could be assigned to various  
237 Enterobacteriaceae genera (91.3%; Fig. 4A) including *Erwinia*, *Rahnella* and *Serratia*  
238 (Fig. 4B). All genera that appear in more than 1% abundance belonged to the  
239 Enterobacteriaceae family, and nine out of fourteen were previously reported to be  
240 present in the pine weevil's community (Berasategui et al. 2016).

241

242 The gut bacterial community of weevils reared on the artificial diet was qualitatively  
243 very similar to that fed on spruce (Fig. 4A). The Enterobacteriaceae was the most  
244 abundant family (87.9%) followed by the Streptococcaceae and Clostridiaceae  
245 families (1.7% in total) (Fig. 4A). Additionally, all Enterobacteriaceae genera present  
246 in more than 1% abundance in spruce-fed weevils were present in artificial diet-fed  
247 insects, with only the addition of *Streptococcus*. However, supplementing antibiotics  
248 into the artificial diet altered the microbiota, rendering it much more diverse (Fig. 4A),  
249 with five families having abundances higher than 1%. In this group, the  
250 Xanthomonadaceae family is present in the highest level (45.5%), followed by the  
251 Enterobacteriaceae (31.5%), Streptococcaceae (3.29%), Clostridiaceae (0.54%),  
252 Anaplasmaceae (specifically *Wolbachia*) (2.5%) and others (16.65%). The  
253 Enterobacteriaceae family is the most susceptible to antibiotic treatment, suffering a  
254 drastic reduction in overall abundance compared to insects reared on their natural  
255 diet or an artificial diet devoid of antibiotics (Fig. 4B).

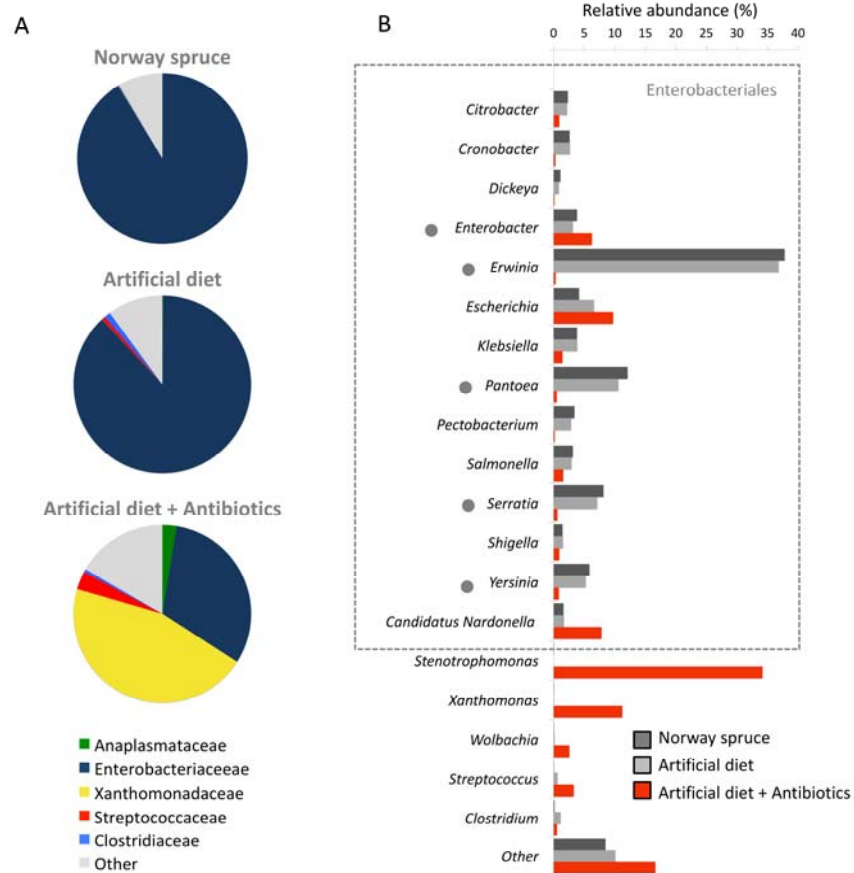

256

257 **Figure 4.** A) Family classification of the bacterial metagenome of pine weevils fed on Norway  
 258 spruce, artificial diet, and artificial diet with antibiotics, respectively. B) Abundance of different  
 259 genera in the gut microbiota of weevils feeding on the three diets. Grey dots depict taxa  
 260 previously found in the gut microbiota of the pine weevil (Berasategui et al. 2016). The  
 261 dashed box indicates members of the Enterobacteriaceae family.  
 262

263 In order to explore the genetic basis of symbiont-mediated diterpene degradation in  
 264 the pine weevil, the three bacterial metagenomes sequenced in this study were  
 265 screened for the presence of a gene cluster (*dit*) predicted to be involved in the  
 266 degradation of diterpenes in *Pseudomonas abietaniphila* BKME-9 (Adams et al,  
 267 2013, Martin and Mohn 2000, Smith et al. 2007, 2008). Genes encoding enzymes  
 268 that have been previously implicated in diterpene degradation were identified using  
 269 BLASTn. The metagenome of beetles feeding on Norway spruce contained 10 out of  
 270 19 *dit* genes (Fig. 5), and the same was true for beetles reared on the artificial diet,  
 271 consistent with the minimal changes observed in the composition of the microbial

272 community. However, supplementing antibiotics into the artificial diet led to a near  
273 complete loss of *dit*-genes in addition to disrupting the composition of the bacterial  
274 associates of *H. abietis* (Fig. 5).

275

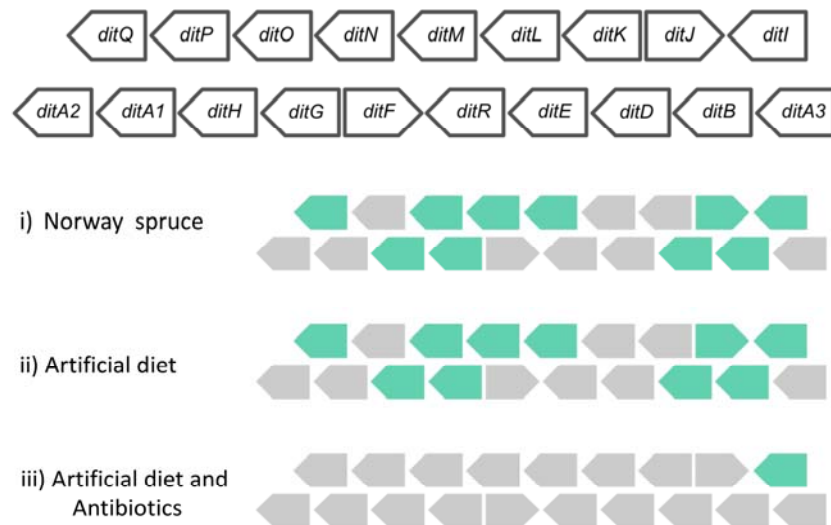

276

277 **Figure 5.** Diterpene gene cluster (Martin and Mohn, 2000) present in the metagenome of pine  
278 weevils feeding on different diets: Norway spruce, artificial diet, and artificial diet amended  
279 with antibiotics. Coloring: turquoise, present; grey, absent.  
280

### 281 **Effect of diterpenes and gut bacteria on weevil fitness**

282 In order to assess the effect that diterpenes and microbially-mediated diterpene  
283 degradation might have on pine weevil fitness, we measured survival and fecundity  
284 of weevils feeding on different types of artificial diet. Insects were fed on diet with a  
285 natural mixture of diterpene acids, with the antibiotic rifampicin, with both diterpenes  
286 and antibiotic, and without any supplementation.

287 We observed no difference in survival rates depending on treatment (Mantel-Cox  
288  $P=0.18$ ; Breslow  $P=0.27$ ; Tarone-Ware  $P=0.19$ ) or sex (Mantel-Cox  $P=0.56$ ; Breslow  
289  $P=0.67$ ; Tarone-Ware  $P=0.66$ ) after 30 days (Fig. 6A). However, we observed  
290 differences between treatments in relation to the number of eggs laid (Fig. 6B).  
291 Individuals that fed on diet with diterpenes only (no antibiotic added) laid more eggs  
292 than individuals in any of the other three groups ( $P=0.05$ ). Likewise, hatching rates of

293 eggs laid by diterpene-fed mothers with their native microbiota were significantly  
 294 higher than in any of the three other groups ( $P=0.01$ , Fig. 6C).  
 295

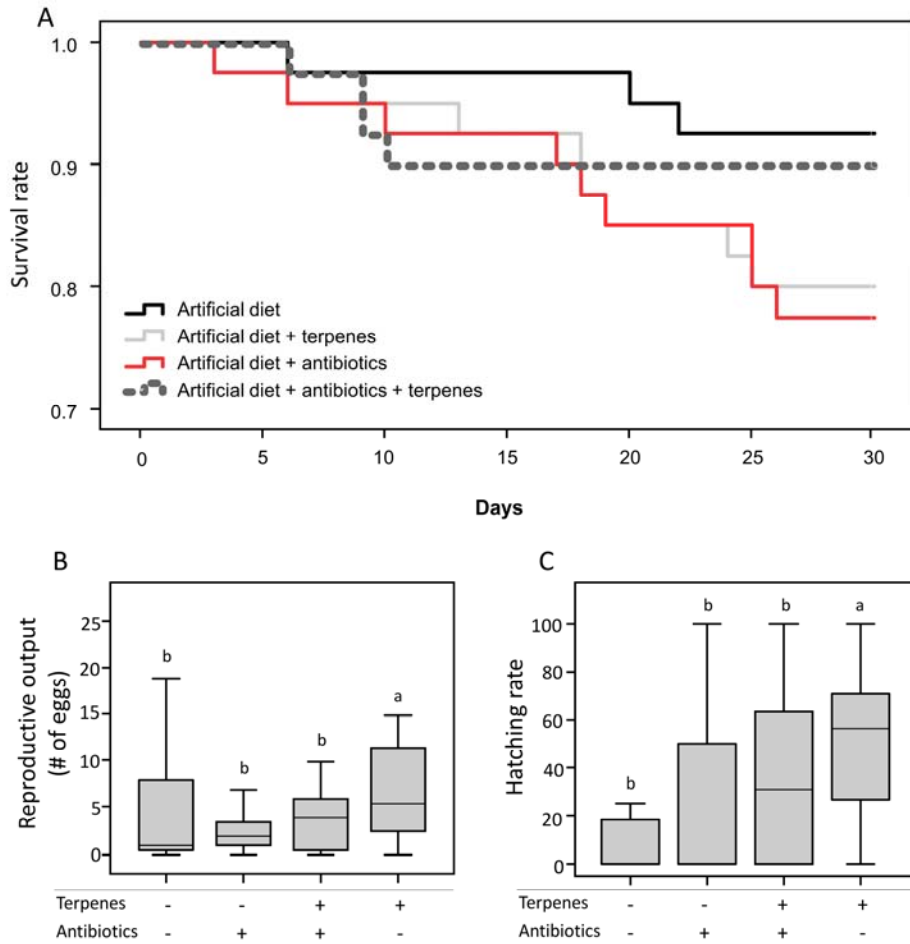

296

297 **Figure 6.** Fitness parameters of pine weevils fed on artificial diet containing no additives  
 298 (black), 0.3% (w/v) of the antibiotic rifampicin (red), 3% (w/w) of a natural diterpene mixture  
 299 (grey), and the antibiotic plus diterpenes (dashed). In the box plots, lines represent medians,  
 300 boxes comprise the 25–75 percentiles, and whiskers denote the range. (a) Survival: treatment  
 301 (Mantel-Cox  $P=0.18$ ; Breslow  $P=0.27$ ; Tarone-Ware  $P=0.19$ ); sex (Mantel-Cox  $P=0.56$ ;  
 302 Breslow  $P=0.67$ ; Tarone-Ware  $P=0.66$ ). (b) Number of eggs laid (ANOVA,  $P=0.05$ ) and (c)  
 303 egg hatching rate (ANOVA,  $P=0.01$ ).

304

305

306 **Discussion**

307 Microorganisms associated with herbivorous insects have been shown to mediate  
308 the outcome of insect-plant interactions across a number of insect groups in different  
309 ways (Tsuchida et al. 2004, Hosokawa et al. 2007). For example, microorganisms  
310 can aid in the exploitation of plant resources by supplementation of essential  
311 nutrients, degradation of complex structural metabolites (Douglas 2009) and  
312 manipulating (Chung et al. 2013) or overcoming (Hammer and Bowers 2015) plant  
313 defenses. Microbial symbionts of herbivorous animals have long been suspected to  
314 aid in the detoxification of plant secondary metabolites and thereby contribute to host  
315 fitness, but direct experimental evidence remains scarce (but see Kohl et al. 2014,  
316 Ceja-Navarro et al. 2015). Here we show that diterpene resin acids, a group of plant  
317 defense compounds abundant in the bark of conifer trees, are degraded in the pine  
318 weevil after ingestion. Gut microbes of the pine weevil contain genes encoding  
319 enzymes that catalyze the degradation of diterpene acids. These microbes were  
320 found to degrade diterpenes in the insect and when cultured separately on medium  
321 containing natural concentrations of one diterpene acid. Diterpene supplementation  
322 of the pine weevil diet in the presence of the native gut microbiota enhances the  
323 weevil's fecundity and egg hatching rate.

324

325 **Diterpene-degrading genes in the pine weevil gut bacterial metagenome nearly**  
326 **eliminated by antibiotic treatment**

327 In agreement with our previous report using 16S rRNA profiling (Berasategui et al.  
328 2016), taxonomic classification of the gut bacterial metagenome of the pine weevil  
329 revealed a community dominated by the Enterobacteriaceae family. Specifically,  
330 members of *Erwinia*, *Pantoea*, *Serratia*, and *Yersinia*, encompassed 90% of the  
331 whole microbiota. Although we detected *Wolbachia* species in all three  
332 metagenomes sequenced, their abundance was markedly lower than that previously

333 reported using 16S rRNA data (Berasategui et al. 2016). While differences in  
334 *Wolbachia* titers within a single insect population have been previously described  
335 (Müller et al. 2013), it is possible that variation in this case arises from bias in the  
336 PCR reaction required for 16S pyrosequencing, which is not required for  
337 metagenome sequencing. The very low abundance of Firmicutes in the present study  
338 is consistent with that of weevils previously collected in the same location (Spain)  
339 which were devoid of this bacterial family (Berasategui et al. 2016). However,  
340 members of the Enterobacteriaceae were as dominant as in the previous study  
341 supporting their role as stable and conserved constituents of the pine weevil gut  
342 microbiota in contrast to the variability affecting other members of the community.  
343 The conserved fraction of the pine weevil microbiota overlaps with that of other  
344 conifer-feeding beetles as well as a conifer-feeding wasp (Adams et al. 2011)  
345 suggesting that this is shaped by a shared environment and may be adaptively  
346 significant (Berasategui et al. 2016).

347         The pine weevil microbial community remained unaltered after two weeks of  
348 beetles feeding on an artificial diet (Fig. 4A), indicating that it is also resilient to  
349 changes in diet. However, the addition of antibiotics did alter community composition,  
350 reducing the relative abundance of most Enterobacteriales (with the exception of  
351 *Enterobacter* sp., *Escherichia* sp., and the bacteriome-localized endosymbionts), and  
352 increasing that of *Stenotrophomonas* sp., *Xanthomonas* sp., and *Wolbachia* (Fig.  
353 4B).

354         Our previous inference of metagenomic functions via PICRUSt (Berasategui  
355 et al. 2016) suggested the enrichment of a gene cluster known as *dit* among *H.*  
356 *abietis*' bacterial associates that is potentially involved in diterpene degradation  
357 based on studies of free-living bacteria (Adams et al. 2013, Martin et al. 2000, Smith  
358 et al. 2007, 2008). Functional annotation of the bacterial metagenome in the present  
359 study revealed the presence of ten out of the 19 known *dit* genes in weevils feeding  
360 on their natural food source as well as on an artificial diet (Fig. 5). However, the



361 supplementation of antibiotics in the artificial diet resulted in the loss of all but one *dit*  
362 gene (Fig. 5).

363 Even with only 10 of 19 reported *dit* genes, the members of the *H. abietis*  
364 microbial community may still be able to degrade diterpene resin acids. Not all 19  
365 genes are required for bacterial catabolism of diterpenoids by *Pseudomonas*  
366 *abietaniphila* BKME-9 (Martin and Mohn 2000, Smith et al. 2004, 2007). For  
367 example, knocking out *ditR* does not impair the growth of this *Pseudomonas* strain  
368 on diterpene-rich media (Martin and Mohn 2000). Conversely, knocking out *ditQ*,  
369 restricts growth of *P. abietaniphila* on dehydroabietic acid but not on abietic acid  
370 (Smith et al. 2004). Moreover, *ditI* and *ditH*, both reported as essential genes for  
371 diterpene degradation, were found to be present in our metagenomic survey of the *H.*  
372 *abietis*' gut bacterial community (Fig. 5). Parallel to previous findings (Adams et al.  
373 2013), phylogenetic binning of *dit*-gene sequences annotated within our  
374 metagenomes revealed that most of the sequences belonged to taxa from the  
375 Enterobacteriaceae, strongly supporting the involvement of this bacterial family in the  
376 degradation of diterpenes within *H. abietis*' gut. Despite also belonging to the  
377 Enterobacteriaceae, the primary endosymbiont of pine weevils, *Nardonella* sp.  
378 (Conord et al. 2008), is not likely to play a major role in this degradation given that it  
379 is not affected by antibiotic treatment (Fig. 4B), and thus is not responsible for either  
380 the differential occurrence of *dit* genes or the reduction in terpene concentration  
381 observed in this study.

382

### 383 **Pine weevil gut microbes degrade diterpenes in the insect and in isolated** 384 **cultures**

385 The possibility of microbial degradation of diterpenes in the pine weevil was  
386 first suggested by our measurements showing an 83% decrease in total diterpene  
387 content between the spruce bark ingested by the weevil and the frass. To determine  
388 if the microbiota degrades diterpenes inside the insect, we manipulated the gut

389 community through the addition of antibiotics to the insect diet. Our results indicated  
390 that the degradation of diterpenes decreased upon addition of antibiotics (Fig. 2), and  
391 these capabilities were rescued in antibiotic-treated insects upon supplementing their  
392 native bacterial community through the diet. We then tested the ability of isolated  
393 weevil microbes to degrade dehydroabietic acid (DHAA) in solution at concentrations  
394 found in spruce bark, and found a significant decline (Fig. 3). Thus experiments with  
395 both weevils and isolated bacterial illustrate the contribution of gut bacteria towards  
396 diterpene breakdown. The correlation of reduced breakdown rates with a reduction in  
397 the expression of diterpene catabolizing genes under antibiotic treatment is another  
398 line of evidence linking the pine weevil gut bacterial community to diterpene  
399 degradation.

400 Symbiotic bacteria have been previously demonstrated to breakdown conifer  
401 resin terpenes. For example, close relatives of *Serratia*, *Rahnella* (both  
402 Enterobacteriales), *Pseudomonas*, and *Brevundimonas* isolated from the gut of bark  
403 beetles (*Dendroctonus ponderosae* and *D. valens*) were found to degrade  
404 monoterpenes and diterpenes (Boone et al. 2013, Xu et al. 2015). Free-living  
405 microbes isolated from conifer pulp mill wastewater and forest soil, such as  
406 *Pseudomonas abietaniphila* BKME-9 (from which the *dit* gene cluster was reported)  
407 and *Burkholderia xenovorans* LB400, are also described to degrade diterpenes  
408 (Smith et al. 2008). These bacteria are also able to utilize diterpenes as their sole  
409 carbon source (Martin and Mohn 2000, Morgan and Wyndhan 2002, Smith et al.  
410 2007).

411 The degradation of plant secondary metabolites by symbiotic bacteria is not  
412 limited to terpenes, nor to insects. For instance, members of the gut community of  
413 the cabbage root fly (*Delia radicum*) harbor a plasmid (*saxA*) involved in metabolizing  
414 the isothiocyanates of the host plant (Welte et al. 2016). The coffee bean borer  
415 (*Hypotenemus hampei*) relies on at least *Pseudomonas fulva*, a member of its gut  
416 bacterial community, to degrade the alkaloid caffeine, thereby increasing the insect's

417 fitness (Ceja-Navarro et al. 2015). Likewise, desert woodrats (*Neotoma lepida*)  
418 harbor a gut microbial assembly that allow their hosts to exploit the toxic creosote  
419 bush (*Larrea tridentata*) through the degradation of phenolic compounds (Kohl et al.  
420 2014, 2016). In addition to bacteria, symbiotic fungi can also degrade plant  
421 secondary metabolites for their hosts. *Lasioderma serricorne*, the cigarette beetle  
422 harbors a symbiotic yeast (*Symbiotaphrina kochii*) in its digestive system that is able  
423 to degrade several plant toxins and use them as sole carbon sources (Dowd and  
424 Shen 1990, Shen and Dowd 1991). Similarly, the phenolics that leaf cutter ants  
425 (*Acromyrmex echinator*) encounter in leaves, are detoxified by a laccase produced  
426 by the ant fungal cultivar, *Leucocoprinus gongylophorus* (De Fine Licht et al. 2012).

427

428 **Gut bacteria increase pine weevil fitness, but not by direct detoxification of**  
429 **diterpenes**

430 To assess the impact of gut bacteria on the pine weevil performance, we  
431 measured several fitness parameters on weevils feeding on diets with and without  
432 the diterpenes and with and without the broad-spectrum antibiotic rifampicin. We  
433 observed a fitness benefit for the weevil as evidenced by higher fecundity and  
434 hatching rate only when insects fed on diterpene-containing diet with a full spectrum  
435 of bacteria (without antibiotics) (Fig. 6B and 6C). Different hypotheses might explain  
436 how gut bacteria can enhance host fitness through the metabolism of terpenes. For  
437 example, removal of diterpenes could reduce the levels of compounds toxic to the  
438 weevils, but our bioassays show that insects that lack their full microbial complement  
439 do not suffer higher adult mortality when feeding on diterpene-containing diet than  
440 insects with all of their native microbes, suggesting that insects have an intrinsic  
441 mechanism of circumventing diterpenoid toxins. Microbes could conceivably assist  
442 insects in degrading terpene toxins (Raffa 2014), but such a contribution does not  
443 seem important in the case of *H. abietis*.

444 Another explanation for the fitness benefits of microbes is that they could  
445 improve the nutritional properties of the pine weevil diet allowing females to allocate  
446 more resources to egg production (Wainhouse et al. 2001). Degraded terpenes might  
447 be directly employed as substrates for insect respiration. Or, if terpenes are readily  
448 used as respiratory substrates by microbes (DiGuistini et al. 2011, Wang et al. 2014),  
449 they could enhance microbial growth and so increase the breakdown of refractory  
450 carbohydrate polymers or increase supplies of nitrogenous compounds, vitamins or  
451 sterols (Douglas 2009, McCutcheon and Moran 2007, Salem et al. 2014), all scarce  
452 resources in conifer bark and phloem. For example, Morales-Jiménez and  
453 colleagues (2009, 2012) demonstrated that members of the gut community of the  
454 conifer-feeding bark beetles *D. ponderosae*, (*Rahnella sp.* *Pantoea sp.* and  
455 *Stenotrophomonas sp.*) and *D. rhizophagous* (*Pseudomonas sp.*, *Rahnella sp.* and  
456 *Klebsiella sp.*) can fix nitrogen (Morales-Jimenez et al. 2012) while free-living fungal  
457 associates of bark beetles can supply *Dendroctonus* beetles with sterols (Bentz and  
458 Six, 2006).

459 Hence for *H. abietis* the fitness benefits of its gut microbes may not be  
460 derived directly from terpene degradation. Rather, the ability to degrade terpenes  
461 may allow microbes to thrive in a terpene-rich environment and enhance pine weevil  
462 growth by providing critical nutrients and vitamins. Given that the taxonomical  
463 composition and functional capabilities of the weevil microbial assembly strongly  
464 resemble those of other bark beetles, wood-feeding wasps, and sawflies exploiting  
465 very similar ecological niches (Berasategui et al. 2016, Adams et al. 2011, 2013,  
466 Boone et al. 2013, Whittome et al. 2007), these other insect groups may also accrue  
467 such fitness benefits from their gut microbiota.

468

469

470 **Material and methods**

471 **Insect collection and maintenance**

472 Adult pine weevils (*Hyllobius abietis*) were collected near Neustadt, Lower Saxony  
473 (Germany) and in Galicia (Spain). In Germany weevils were collected by leaving a  
474 recently cut log near a clear cut for some days and manually collecting the insects  
475 that were attracted. In Spain beetles were collected with clean pit-fall traps baited  
476 with  $\alpha$ -pinene and ethanol (Nordlander 1987). Vials without lids were filled with  
477 ethanol, and the entrance blocked with bait-impregnated paper towels or cotton and  
478 placed leaning towards a pine branch. Once in the lab, the beetles were stored in  
479 darkness at 10°C in boxes of 50 individuals with moist paper, a container with soil  
480 and Norway spruce (*Picea abies*) twigs. Insects were brought to the lab bench one  
481 week before each experiment for acclimatization.

482 **Semi-artificial and artificial diet preparation**

483 **Semi-artificial diet.** Bark and cambium of Norway spruce branches were manually  
484 removed from the wood and frozen in liquid nitrogen. Needles were removed with a  
485 scalpel and the remaining tissues were homogenized manually with a mortar and  
486 pestle under liquid nitrogen. Agar (1.60 g, Roth, Karlsruhe, Germany) was diluted in  
487 50 mL of water and let cool to ~ 60°C. This mixture was added to 18.75 g of the  
488 homogenized spruce tissue and stirred until homogeneous. The antibiotic containing  
489 semi-artificial diet was prepared by adding the broad spectrum antibiotic rifampicin to  
490 the diet to a final concentration of 0.3% (w/v).

491 **Complete artificial diet.** The diet used for seed-feeding pyrrhocorid bugs described  
492 in Salem et al. (2014) was modified with the addition 6 mL of sunflower seed oil  
493 instead of 20 mL.

494 **Degradation of diterpenes on passage through weevils**

495 Pine weevils (62 individuals) were kept without food in plastic boxes for 4 days and  
496 sprayed with water daily to maintain humidity. After this starvation period, insects  
497 were allowed to feed on Norway spruce twigs *ad libitum*. After 16 hours, insects were  
498 transferred to glass petri dishes and allowed to defecate for 24 hours. Feces were  
499 collected and suspended in 5 ml water. We added the suspended feces to *tert*-butyl  
500 methyl ether (1:5, v/v) in a total of 25 ml and let the mixture shake for 20 hours, after  
501 which 5 ml of 0.1 mM (NH<sub>4</sub>)<sub>2</sub>CO<sub>3</sub>, pH 8.0, were added to the mixture and vortexed  
502 (Schmidt et al. 2011). The ether layer was removed and concentrated to 0.5 ml and  
503 analyzed for diterpenes by GC-MS (see below) alongside the ether fraction of the  
504 bark of Norway spruce twigs prepared in a similar manner. The quantity of bark  
505 ingested by the weevils in the feeding period was determined by weighing the twigs  
506 before and after with a correction for water loss.

507 **Manipulation of the gut microbiota and *in vivo* degradation of diterpenes**

508 To assess the potential role of the gut bacteria in the degradation of terpenoids within  
509 the beetle gut, six weevils (three males and three females) in individual petri dishes  
510 were allocated to each of three treatments: (i) control, (ii) antibiotic, and (iii)  
511 reinfected. Control individuals were fed on control semi-artificial diet for 14 days,  
512 whereas antibiotic-treated individuals were fed on semi-artificial diet amended with  
513 the antibiotic rifampicin for 14 days. Reinfected individuals were fed on the antibiotic  
514 diet for half of the experiment and then switched to a semi-artificial diet amended  
515 with a gut suspension of untreated weevils for the remaining time. We generated this  
516 suspension by crushing the guts of four untreated weevils in 1 ml PBS and vortexing.  
517 Insects were provided with 100 mg of diet every day that was supplemented with 10  
518 µL of gut suspension in the case of the reinfected treatment or PBS in the control.  
519 Feces were collected daily and frozen at -20°C. Feces from the last experimental day

520 were extracted with 200  $\mu$ l *tert*-butyl methyl ether, shaken overnight and prepared for  
521 diterpene analysis via GC-MS as described below.

### 522 **Degradation of diterpenes by cultured gut microbes**

523 Six beetles were dissected under sterile conditions. Individual guts were suspended  
524 in a vial of 1 mL of PBS (phosphate-buffered saline). To separate bacteria from the  
525 gut walls, tissues were sonicated (50/60 Hz, 117 V, 1.0 Amp) for 30 s, macerated  
526 with a pestle and vortexed at medium speed for 10 s. Vials were centrifuged at  
527 3000g to pellet host tissues and the supernatant was filtered using 10  $\mu$ m syringe  
528 filters.

529 A 10  $\mu$ L quantity of each bacterial suspension was inoculated in 10 mL LB  
530 medium and grown overnight shaking at 220 rpm at room temperature. Overnight  
531 cultures were diluted to an optical density of 0.1 at 600 nm ( $OD_{600}$ ) with additional LB  
532 medium. To test whether the gut community of the pine weevil is able to degrade  
533 diterpenes, we inoculated 10  $\mu$ L of the diluted bacterial culture in a vial of 990  $\mu$ L LB  
534 medium amended with dehydroabietic acid (DHAA) as the sodium salt. In the same  
535 way, 10  $\mu$ L LB medium was inoculated in control vials of medium amended with  
536 DHAA. The experiment was carried out in a 24-well flat bottom plate (Sarstedt,  
537 Nümbrecht Germany), replicated six times, and allowed to grow for 5 days. Samples  
538 were taken for analysis on the 1<sup>st</sup> and 5<sup>th</sup> days. Upon sampling, the content of each  
539 well was transferred to Eppendorf tubes and centrifuged at 3000g for 5 min to pellet  
540 bacterial cells. The supernatant was then transferred to glass vials for diterpene  
541 analysis by HPLC rather than GC-MS to detect the sodium salts directly.

542 The sodium salt of DHAA was produced by dissolving dehydroabietic acid  
543 (Sigma, 1.33 g) in 12 mL MeOH. This mixture was amended with an equimolar  
544 amount of  $NaHCO_3$  (372 mg) dissolved in 3 mL of water. The mixture was left  
545 standing in a closed vial for 14 days at room temperature to allow the reaction to  
546 proceed. Subsequently, the solution was filtered with a syringe filter and evaporated

547 to dryness under nitrogen. In order to prepare the experimental medium, 750 mg of  
548 DHAA in this form was added to 1.5 L of LB medium. After autoclaving (121°C, 20  
549 min), the solution was vacuum-filtered to remove un-dissolved particles.

#### 550 **DNA extraction and Illumina-based metagenome sequencing**

551 For one week, a group of six weevils were reared on one of three different diets: (1)  
552 Norway spruce (*Picea abies*) twigs, (2) artificial diet (AD), or (3) artificial diet  
553 amended with the antibiotic rifampicin at 0.3% (w/v). Through dissection, the midgut  
554 region was harvested from every individual using sterile forceps and iris scissors.  
555 Once dissected, DNA was extracted from the midgut using the Microbiome Kit  
556 (Qiagen, Hilden, Germany) following the manufacturer's instructions. Equimolar  
557 concentrations of samples from the same treatment were pooled, resulting in a single  
558 sample per treatment. Sequencing of a 150-bp library was conducted for each  
559 treatment using an Illumina Genome Analyzer IIx at the Genome Center of the Max  
560 Planck Institute in Cologne (Germany). The assembly was generated with Meta-  
561 Velvet v1.0.19 (Namiki et al. 2012) based on ~40 million quality-filtered read pairs  
562 and subjected to a gap-closing analysis. For annotation of gene content as well as  
563 taxonomic assignment, we used the Meta Genome Rapid Annotation using  
564 Subsystem Technology (MG-RAST) (Meyer et al. 2008).

565 We determined the community profile in the metagenomic dataset using the  
566 "Best Hit Classification" tool of MG-RAST to classify CDSs on the basis of best  
567 BLASTP hits with a minimum identity cutoff of 60%, and a maximum e-value cutoff of  
568  $10^{-5}$ . Sequences were classified at the genus level (95% identity), and taxa with <1%  
569 abundance were removed. To examine the enrichment patterns of genes encoding  
570 diterpene degradation genes across the different treatments, we performed BLASTP  
571 against a custom data set of proteins belonging to the *dit* diterpene acid degradation  
572 pathway of *Pseudomonas abietaniphila* BKME-9, as previously described by Adams  
573 et al. (2013).



574 **Fitness assays**

575 Weevils (80 male and 80 female) were randomly distributed as pairs in plastic boxes.  
576 Each box contained one piece of moisture paper and an Eppendorf tube lid as  
577 container for artificial diet prepared as described above. Each box was randomly  
578 assigned to one of four treatments: (i) diet without additions, (ii) diet with the  
579 antibiotic rifampicin at 0.3% (w/v), (iii) diet with a natural mixture of diterpene acids  
580 and (iv) diet with both antibiotic and diterpene acids. The diterpene acids were from a  
581 natural conifer mixture, sold as “gum rosin” (Sigma), which was dissolved in  
582 methanol, added to the diet as 3% (w/w), and the methanol allowed to fully evaporate  
583 before using. Weevils were subjected to the treatments for one month. As fitness  
584 parameters, survival, number of eggs laid and number of eggs hatched were  
585 recorded every 24 hours.

586 **Statistics**

587 ***In vitro* assays.** Differences in the concentration of terpenes in liquid cultures were  
588 assessed in SPSS with an ANOVA.

589 ***In vivo* assays.** Differences in the amount of terpenes in the feces of weevils were  
590 analyzed using a Kruskal–Wallis test.

591 **Fitness assays.** The number of eggs laid and the hatching rate were analyzed in R  
592 with a generalized linear model. Survival was analyzed in SPSS using three different  
593 statistical tests: Mantel-Cox, Breslow, and Tarone-Ware.

594

595 **Chemical analyses**

596 **GC-MS analysis of diterpene resin acids**

597 Diterpene resin acids of Norway spruce bark and pine weevil feces were analyzed as  
598 described in Schmidt et al. (2011). In brief, *tert*-butyl methyl ether extracts that had  
599 been washed with (NH<sub>4</sub>)<sub>2</sub>CO<sub>3</sub> to remove small organic acids were methylated with N-

600 trimethylsulfonium hydroxide in methanol and concentrated under nitrogen.  
601 Separation was accomplished on a polyethylene glycol stationary phase by split  
602 injection. Compounds were identified by comparison with methyl esters produced  
603 from authentic diterpene acid standards and quantified with an internal standard of  
604 methylated dichlorodehydroabiatic acid.

#### 605 **HPLC analysis of diterpene resin acids (sodium salts)**

606 Samples were analyzed on an HPLC (1100 series equipment, Agilent Technologies,  
607 Santa Clara, CA, USA), coupled to a photodiode array detector (Agilent  
608 Technologies). Separation was accomplished on a Nucleodur Sphinx RP column  
609 (250 x 4.6 mm, 5 µm particle size, Macherey-Nagel, Düren, Germany). The mobile  
610 phase consisted of 0.2% formic acid in water (A) and acetonitrile (B) with a flow of 1  
611 ml per minute with the following gradient: start 20% B, 0-20 min 20-100% B, 20-23  
612 min 100% B, 23.1-28 min 20% B. For diterpene quantification, peaks were integrated  
613 at 200 nm and an external standard curve with an authentic standard of DHAA  
614 (Sigma, Taufkirchen, Germany) was created.

615

#### 616 **Conflict of interests**

617 The authors declare no conflict of interests.  
618

#### 619 **Author Contributions**

620 AB carried out the microbiological and chemical lab work, performed the data and  
621 statistical analyses, and wrote the manuscript; HS carried out the molecular work and  
622 metagenome analysis; CP synthesized the DHAA salt; VMS aided in chemical lab  
623 work; AS provided reagents; AB, AS, MK, JG and conceived of the study. All authors  
624 gave critical comments on the manuscript and gave final approval for publication.  
625

#### 626 **Acknowledgements**

627 We would like to thank Selina Secinti and Marcus Grant for laboratory assistance.  
628 We are grateful to Luis Sampedro, from the Misión Biológica de Galicia (MBG-CSIC)  
629 for providing weevils. We gratefully acknowledge funding from the Max Planck  
630 Society (all authors), and the Alexander von Humboldt Foundation (HS).

631  
632

633

634 **References**

635

- 636 1. Adams AS, Jordan MS, Adams SM, Suen G, Goodwin LA, Davenport KW,  
637 Currie CR, Raffa KF (2011). Cellulose-degrading bacteria associated with  
638 the invasive woodwasp *Sirex noctilio*. *The ISME Journal*, **5**, 8: 1323-1331.
- 639 2. Adams AS, Aylward FO, Adams SM, Aukema BH, Currie CR, Suen G,  
640 Raffa KF. (2013) Mountain pine beetles colonizing historical and naive  
641 host trees are associated with a bacterial community highly enriched in  
642 genes contributing to terpene metabolism. *Applied Environmental*  
643 *Microbiology*, **79** 3468-3475.
- 644 3. Bakkali F, Averbeck S, Averbeck D, Waomar M. (2008) Biological effects  
645 of essential oils: a review. *Food and Chemical Toxicology*, **46** 446–475
- 646 4. Berasategui A, Axelsson K, Nordlander G, Schmidt A, Borg-Karlson A-K,  
647 Gershenzon J, Terenius O, Kaltenpoth M. (2016) The gut microbiota of  
648 the pine weevil is similar across Europe and resembles that of other  
649 conifer beetles. *Molecular Ecology*,. **25** 4014-4031.
- 650 5. Bentz BJ, Six DL. (2006) Ergosterol content of fungi associated with  
651 *Dendroctonus ponderosae* and *Dendroctonus rufipennis* (Coleoptera:  
652 Curculionidae, Scolytinae). *Ann. Entomol. Soc. Am.* **99** 189–194
- 653 6. Boone CK, Keefover-Ring K, Mapes AC, Adams AS, Bohlmann J, Raffa  
654 KF. (2013) Bacteria associated with a tree-killing insecto reduce  
655 concentrations of plant defense compounds. *Journal of Chemical*  
656 *Ecology*,. **39** 1003-1006.
- 657 7. Cardoza YJ, Klepzig KD, Raffa KF. (2006) Bacteria in oral secretions o  
658 fan endophytic insecto inhibit antagonistic fungi. *Ecological Entomology*, **31**  
659 636-645.
- 660 8. Ceja-Navarro JA, Vega FE, Karaoz U, Hao Z, Jenkins S, Lim HC, Kosina  
661 P, Infante F, Northen TR, Brodie EL. (2015) Gut microbiota mediate  
662 caffeine detoxification in the primary insect pest of coffee. *Nature*  
663 *Communications*, **6** 7618, 1-9.
- 664 9. Conolly JD, Hill RA. (1991) Dictionary of terpenoids. London: Chapman &  
665 Hall.
- 666 10. Conord C, Despres L, Vallier A, Balmand S, Miquel C, Zundel S,  
667 Lemperiere G, Heddi A. (2008) Long-term evolutionary stability of  
668 bacterial endosymbiosis in Curculionoidea: additional evidence of

- 669 symbiont replacement in the Dryophthoridae Family. *Molecular Biology and*  
670 *Evolution*, **25** 859-868.
- 671 11. Chung SH, Rosa C, Scully ED, Pfeiffer M, Tooker JF, Hoover K, Luthe  
672 DS, Felton GW. (2013) Herbivore exploits orally secreted bacteria to  
673 suppress plant defenses. *Proceedings of the National Academy of*  
674 *Sciences of the United States of America*, **110** 15728-15733.
- 675 12. Cook SP, Hain FP. (1988) Toxicity of host monoterpenes to *Dendroctonus*  
676 *frontalis* and *Ips calligraphus* (Coleoptera: Scolytidae). *Journal of*  
677 *Entomological Sciences*, **23** 287–292.
- 678 13. De Fine Licht HH, Schiott M, Rogowska-Wrzesinska A, Nygaard S,  
679 Roepstorff P, Boomsma JJ. (2012) Laccase detoxification mediates the  
680 nutritional alliance between leaf-cutting ants and fungus-garden  
681 symbionts. *Proceedings of the National Academy of Sciences of the*  
682 *United States of America*, **110**, 583-587.
- 683 14. Després L, David J-P, Gallet C. (2007) The evolutionary ecology of insect  
684 resistance to plant chemicals. *Trends in Ecology and Evolution* **22** 298-  
685 307.
- 686 15. DiGuistini S, Wang Y, Liao NY, Taylor G, Tanguay P, Feau N, Henrissat  
687 B, Chan SK, Hesse-Orce U, Alamouti SM, Tsui CKM, Docking RT,  
688 Levasseur A, Haridas S, Robertson G, Birol I, Holt RA, Marra MA,  
689 Hamelin RC, Hirst M, Jones SJM, Bohlmann J, Breuil C. (2011) Genome  
690 and transcriptome analyses of the mountain pine beetle-fungal symbiont  
691 *Grosmannia clavigera*, a lodgepole pine pathogen. *Proceedings of the*  
692 *National Academy of Sciences of the United States of America*, **108**  
693 2504–2509  
694
- 695 16. Dohet L, Grégoire JC, Berasategui A, Kaltenpoth M, Biedermann P.  
696 (2016) Bacterial and fungal symbionts of parasitic *Dendroctonus* bark  
697 beetles *FEMS Microbiology Ecology*, **92**, 2016, fiw129
- 698 17. Douglas AE. (2009) The microbial dimension in insect nutritional ecology.  
699 *Functional Ecology*, **23** 38-47.
- 700 18. Dowd PF, Shen SK (1990) The contribution of symbiotic yeast to toxin  
701 resistance of the cigarette beetle (*Lasioderma serricornis*). *Entomologia*  
702 *Experimentalis et Applicata*, **56**, 3 241-248.
- 703 19. Erbilgin N, Krokene P, Christiansen E, Zeneli G, Gershenson J. (2006)  
704 Exogenous application of methyl jasmonate elicits defenses in Norway

- 705 spruce (*Picea abies*) and reduces host colonization by the bark beetle *Ips*  
706 *typographus*. *Oecologia*, **148** 426-436.
- 707 20. Ericsson A, Gref R, Hellqvist C, Langström B. (1988) Wound response of  
708 living bark of Scots pine and its influence on subsequent feeding by  
709 *Hylobius abietis*. In: *Mechanisms of woody plant defenses against insects*,  
710 WJ Mattson, J Levieux, C Bernard-Dagan (Eds.). Springer Verlag. New  
711 York, Berlin, Heidelberg.
- 712 21. Gershenzon J, Dudareva N. (2007) The function of terpene natural  
713 products in the natural world. *Nature Chemical Biology* **3** 408-414.
- 714 22. Hammer TJ, Bowers MD. (2015) Gut microbes may facilitate insect  
715 herbivory of chemically defended plants. *Oecologia* **179** 1-14.
- 716 23. Hammerbacher A, Schmidt A, Wadke N, Wright LP, Schneider B,  
717 Bohlmann J, Brand WA, Fenning TM, Gershenzon J, Paetz C. 2013 A  
718 common fungal associate of the spruce bark beetle metabolizes the  
719 stilbene defenses of Norway spruce. *Plant Physiology*, **162** 1324-1336
- 720 24. Harris LJ, Borden JH, Pierce HD Jr, Oehlschlager AC. (1983) Cortical  
721 resin monoterpenes in Sitka spruce and resistance to the white pine  
722 weevil, *Pissodes strobi* (Coleoptera: Curculionidae). *Canadian Journal of*  
723 *Forest Research*, **13** 350–352.
- 724 25. Heijari J, Nerg AM, Kainulainen P, Viiri H, Vuorinen M, Holopainen JK.  
725 (2005) Application of methyl jasmonate reduces growth but increases  
726 chemical defence and resistance against *Hylobius abietis* in Scots pine  
727 seedlings. *Entomologia Experimentalis et Applicata*, **115** 117-124.
- 728 26. Hosokawa T, Kikuchi Y, Shimada M, Fukatsu T. (2007) Obligate symbiont  
729 involved in pest status of host insect. *Proceedings of the Royal Society B-*  
730 *Biological Sciences*, **274** 1979–1984.
- 731 27. Hu X, Yu J, Wang C, Chen H. (2014) Cellulolytic bacteria associated with  
732 the gut of *Dendroctonus armandi* larvae (Coleoptera: Curculionidae:  
733 Scolytinae). *Forests* **5** 455-465.
- 734 28. Ikeda T, Matsumura F, Benjamin DM. (1977) Mechanism of feeding  
735 discrimination between matured and juvenile foliage by two species of  
736 pine sawflies. *Journal of Chemical Ecology*, **3** 677–694.
- 737 29. Keeling CI, Bohlmann J. (2006) Genes, enzymes and chemicals of  
738 terpenoid diversity in the constitutive and induced defence of conifers  
739 against insects and pathogens. *New Phytologist*, **170** 665-675.

- 740 30. Kohl KD, Weiss RB, Cox J, Dale C, Dearing MD. (2014) Gut microbes of  
741 mammalian herbivores facilitate intake of plant toxins. *Ecology Letters*, **10**  
742 1238-1246.
- 743 31. Kohl KD, Stengel A, Dearing D. (2016) Inoculation of tannin-degrading  
744 bacteria into novel hosts increases performance on tannin-rich diets.  
745 *Environmental Microbiology*, **18** 1720-1729.
- 746 32. Langström B, Day K. (2004) Damage and control of weevil pests. In: Bark  
747 and wood boring insects in living trees in Europe, a synthesis. F Lieutier,  
748 Day KR, Battisti A, Gregoire JC, Evans HF (eds.) Springer Netherlands.  
749 pp 415-444.
- 750 33. Leather SR, Day KR, Salisbury AN (1999) The biology and ecology of the  
751 large pine weevil, *Hylobius abietis* (Coleoptera: Curculionidae): a problem  
752 of dispersal? *Bulletin of Entomological Research*, **89**, 3–16.
- 753 34. Lunde CS, Kubo I. 2000 Effect of polygodial on the mitochondrial ATPase  
754 of *Saccharomyces cerevisiae*. *Antimicrobial Agents and Chemotherapy*,  
755 **44** 1943–1953.
- 756 35. Malecky M, Albarello H and Broudiscou LP. (2012) Degradation of  
757 terpenes and terpenoids from Mediterranean rangelands by mixed rumen  
758 bacteria in vitro. *Animal* **6** 612-616.
- 759 36. Martin VJJ, Mohn WW. (2000) Genetic investigation of the catabolic  
760 pathway for degradation of abietane diterpenoids by *Pseudomonas*  
761 *abietaniphila* BKME-9. *Journal of Bacteriology*, **182** 3784-3793.
- 762 37. McCutcheon JP, Moran NA (2007) Parallel genomic evolution and  
763 metabolic interdependence in an ancient symbiosis. *Proceedings of the*  
764 *National Academy of Sciences of the United States of America*, **104**  
765 19392–19397.
- 766 38. Meyer F, Paarmann D, D'Souza M, Olson R, Glass EM, Kubal M, Paczian  
767 T, Rodriguez A, Stevens R, Wilke A Wilkening J, Edwards RA. (2008) The  
768 metagenomics RAST server - a public resource for the automatic  
769 phylogenetic and functional analysis of metagenomes. *BMC*  
770 *Bioinformatics* **9** 386.
- 771 39. Mithoefer A, Boland W. (2012) Plant defense against herbivores: chemical  
772 aspects. *Annual Reviews in Plant Biology*, **63** 431-450.
- 773 40. Morales-Jiménez J, Zúñiga G, Villa-Tanaca L, Hernández-Rodríguez C.  
774 (2009) Bacterial community and nitrogen fixation in the red turpentine  
775 beetle, *Dendroctonus valens* LeConte (Coleoptera: Curculionidae:  
776 Scolytinae). *Microbial Ecology*, **58** 879-891.

- 777 41. Morales-Jiménez J, Zúñiga G, Ramírez-Saad HC, Hernández-Rodríguez  
778 C. (2012) Gut-associated bacteria throughout the life cycle of the bark  
779 beetle *Dendroctonus rhizophagous* Thomas and Bright (Curculionidae:  
780 Scolytinae) and their cellulolytic activities. *Microbial Ecology*, **64** 268-278.
- 781 42. Moreira X, Sampedro L, Zas R. (2009) Defensive responses of *Pinus*  
782 *pinaster* seedlings to exogenous application of methyl-jasmonate:  
783 concentration effect and systemic response. *Environmental and*  
784 *Experimental Botany*, **67** 94-100.
- 785 43. Morgan CA, Wyndham RC (2002) Characterization of tdt genes for the  
786 degradation of tricyclic diterpenes by *Pseudomonas diterpeniphila* A19-  
787 6a. *Canadian Journal of Microbiology*, **48**, 1: 49-59.
- 788 44. Müller MJ, Dörr NC, Deprá M, Schmitz HJ, Valiati VH, Valente VL. (2013)  
789 Reevaluating the infection status by the *Wolbachia* endosymbiont in  
790 *Drosophila* Neotropical species from the *willistoni* subgroup. *Infection*  
791 *Genetics and Evolution*. **19** 232-239.
- 792 45. Namiki T, Hachiya T, Tanaka H, Sakakibara Y (2012) MetaVelvet: An  
793 extension of Velvet assembler to de novo metagenome assembly from  
794 short sequence reads. *Nucleic Acids Research*, **40** e155.
- 795 46. Nordlander G (1987) A method for trapping *Hylobius abietis* (L.) with a  
796 standardized bait and its potential for forecasting seedling damage.  
797 *Scandinavian Journal of Forest Research*, **2**, 199–213.
- 798 47. Nordlander G, Hellqvist C, Johansson K, Nordenhem H (2011)  
799 Regeneration of European boreal forests: effectiveness of measures  
800 against seedling mortality caused by the pine weevil *Hylobius abietis*.  
801 *Forest Ecology and Management*, **262**, 2354–2363.
- 802 48. Petersson M, Orlander G (2003) Effectiveness of combinations of  
803 shelterwood, scarification, and feeding barriers to reduce pine weevil  
804 damage. *Canadian Journal of Forest Research – Revue Canadienne De*  
805 *Recherche Forestiere*, **33**, 64–73.
- 806 49. Raffa KF, Smalley EB. (1995) Interaction of pre-attack and induced  
807 monoterpene concentrations in host conifer defense against bark beetle-  
808 fungal complexes. *Oecologia* **102** 285–295.
- 809 50. Raffa KF. (2014) Terpenes tell different tales at different scales:  
810 glimpses into the chemical ecology of conifer-bark beetle- microbial  
811 interactions. *Journal of Chemical Ecology*, **40** 1-20.
- 812 51. Rastogi N, Abaoul J, Goh KS, Devallois A, Philogene E, Burgeois P.  
813 (1998) Antimycobacterial activity of chemically defined natural substances

- 814 from the Caribbean flora in Guadeloupe. *FEMS Immunology and Medical*  
815 *Microbiology*, **20** 267–273.
- 816 52. Rocchini LA, Lindgren BS, Bennett RG. (2000) Effects of resin flow and  
817 monoterpene composition on susceptibility of lodgepole pine to attack by  
818 the Douglas-fir pitch moth, *Synanthedon novaroensis* (Lep., Sesiidae).  
819 *Journal of Applied Entomology*, **124** 87–92.
- 820 53. Salem H, Bauer E, Strauss AS, Vogel H, Marz M, Kaltenpoth M. (2014)  
821 Vitamin supplementation by gut symbionts ensures metabolic  
822 homeostasis in an insect host. *Proceedings of the Royal Society B-*  
823 *Biological Sciences*, **281** 20141838.
- 824 54. Sampedro L, Moreira X, Zas R. (2011) Resistance and response of *Pinus*  
825 *pinaster* seedlings to *Hylobius abietis* after induction with methyl  
826 jasmonate. *Plant Ecology*, **3** 397-401.
- 827 55. Schmidt A, Zeneli G, Hietala A, Fossdal C, Krokene P, Christiansen E,  
828 Gershenzon J. (2005) Induced chemical defences in conifers: Biochemical  
829 and molecular approaches to studying their function. In J. Romeo (Ed.),  
830 Chemical Ecology and Phytochemistry in Forest Ecosystems (pp. 1-28).  
831 Amsterdam: Elsevier
- 832 56. Schmidt A, Nagel R, Krekling T, Christiansen E, Gershenzon J, Krokene  
833 P. (2011) Induction of isoprenyl diphosphate synthases, plant hormones  
834 and defense signaling genes correlates with traumatic resin duct  
835 formation in Norway spruce (*Picea abies*). *Plant Molecular Biology*, **77**  
836 577-590
- 837 57. Shen SK, Dowd PF. (1991). Detoxification spectrum of the cigarette  
838 beetle symbiont of *Symbiotaphrina kochii* in culture. *Entomologia*  
839 *Experimentalis et Applicata*. **60** 51-59.
- 840 58. Smith DJ, Martin VJJ, Mohn WW (2004) A cytochrome P450 involved in  
841 the metabolism of abietane diterpenoids by *Pseudomonas abietaniphila*  
842 BKME-9. *Journal of Bacteriology*, **186**, 3631–3639.
- 843 59. Smith DJ, Park J, Tiedje J, Mohn WW. (2007) A large gene cluster in  
844 *Burkholderia xenovorans* encoding abietane diterpenoid catabolism.  
845 *Journal of Bacteriology*, **189** 6195-6204.
- 846 60. Smith DJ, Patrauchan MA, Florizone C, Eltis LD, Mohn WW. (2008)  
847 Distinct roles for two CYP226 family cytochromes P450 in abietane  
848 diterpenoid catabolism by *Burkholderia xenovorans* LB400. *Journal of*  
849 *Bacteriology*, **190** 1575-1583.



- 850 61. Tomlin ES, Borden JH, Pierce HD Jr. (1996) Relationship between cortical  
851 resin acids and resistance of Sitka spruce to white pine weevil. *Canadian*  
852 *Journal of Botany* **74** 599–606.
- 853 62. Tomlin ES, Antonejevic E, Alfaro RI, Borden JH. (2000) Changes in  
854 volatile terpene and diterpene resin acid composition of resistant and  
855 susceptible white spruce leaders exposed to simulated white pine weevil  
856 damage. *Tree Physiology*, **20** 1087–1095.
- 857 63. Tsuchida T, Koga R, Fukatsu T. 2004 Host plant specialization governed  
858 by facultative symbiont. *Science* **303** 1989.
- 859 64. Wainhouse D, Ashburner R, Boswell R. (2001). Reproductive  
860 development and maternal effects in the pine weevil *Hylobius abietis*.  
861 *Ecological Entomology*, **26** 655-661.
- 862 65. Wallertz K, Nordlander G, Orlander G (2006) Feeding on roots in the  
863 humus layer by adult pine weevil, *Hylobius abietis*. *Agricultural and Forest*  
864 *Entomology*, **8**, 273–279.
- 865 66. Wang Y, Lim L, Madilao L, Lah L, Bohlmann J, Breuil C (2014) Gene  
866 discovery for enzymes involved in limonene modification or utilization by  
867 the mountain pine beetle-associated pathogen *Grosmannia clavigera*.  
868 *Applied and Environmental Microbiology*, **80** 4566–4576
- 869 67. Welte CU, de Graaf RM, van den Bosch TJM, Op den Camp HJ, van Dam  
870 NM, Jetten MSM. (2016) Plasmids from the gut microbiome of cabbage  
871 root fly larvae encode SaxA that catalyzes the conversion of the plant  
872 toxin 2-phenylethyl isothiocyanate. *Environmental Microbiology*, **18** 1379-  
873 1390.
- 874 68. Werner RA. (1995) Toxicity and repellency of 4-allylanisole and  
875 monoterpenes from white spruce and tamarack to the spruce beetle and  
876 eastern larch beetle (Coleoptera: Scolytidae). *Environmental Entomology*  
877 **24** 372–379.
- 878 69. Whittome B, Graham RI, Levin DB. (2007) Preliminary examination of gut  
879 bacteria from *Neodiprion abietis* (Hymenoptera: Diprionidae) larvae.  
880 *Journal of the Entomological Society Ontario*, **138** 49-63.
- 881 70. Xu LT, Lu M, Sun JH. (2015) Invasive bark beetle associated microbes  
882 degrade a host defensive monoterpene. *Insect Science*. **23** 183-90.
- 883 71. Zhao T, Krokene P, Hu J, Christiansen E, Björklund N, Langström B,  
884 Solheim, H, Borg-Karlson AK. (2011) Induced terpene accumulation in  
885 Norway spruce inhibits bark beetle colonization in a dose-dependent  
886 manner. *PLOS one* **6** e26649.

887 **Data Accesibility**

888 Accession numbers will be provided upon acceptance.
